# Supplementary material for: Mild Acquired von Willebrand Syndrome and Cholestasis in Pediatric and Adult Patients with Fontan Circulation
Source: MDPI journal article supplement (doi:10.3390/jcm12031240), 2023-02-03
Supplement: s1 [file s1]

**Supplemental Figures:**

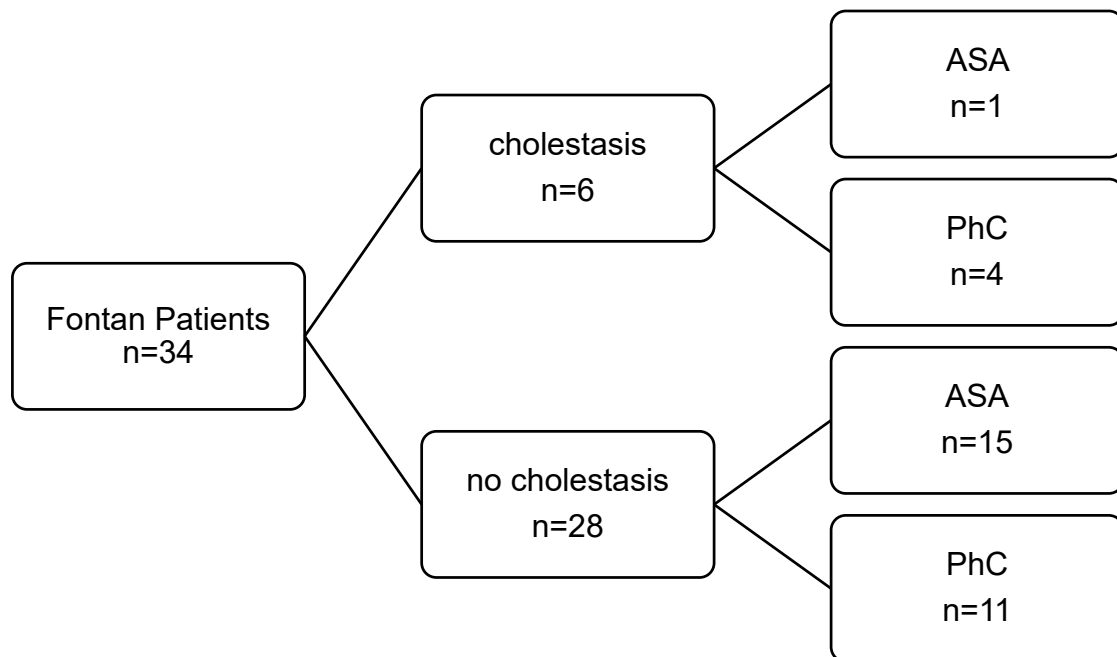

**Figure S1:** Overview of groups and subcohorts investigated in this study.

**Abbreviations:** ASA, acetylsalicylic acid; PhC, Phenprocoumon

### Supplemental Tables:

**Table S1.** Unconjugated bile acids (BA) and their glycine (G) or taurine (T) conjugates analyzed in this study design.

| Unconjugated Bas             | G- conjugated BA | T- conjugated BA |
|------------------------------|------------------|------------------|
| Cholic acid (CA)             | GCA              | TCA              |
| Chenodeoxycholic acid (CDCA) | GCDCA            | TCDCA            |
| Deoxycholic acid (DCA)       | GDCA             | TDCA             |
| Lithocholic acid (LCA)       | GLCA             | TLCA             |
| Ursodeoxycholic acid (UDCA)  | GUDCA            | TUDCA            |

**Table S2:** Descriptive data and results of the Mann-Whitney U tests, comparing the relative bile acid (BA) values between cholestatic and non-cholestatic Fontan patients.

|       | Compared subcohorts | n  | Mean  | IQR         | p-value |
|-------|---------------------|----|-------|-------------|---------|
| GCA   | cholestasis         | 6  | 0.323 | 0.317-0.382 | <0.001  |
|       | no cholestasis      | 28 | 0.148 | 0.093-0.203 |         |
| GCDCA | cholestasis         | 6  | 0.331 | 0.258-0.386 | 0.364   |
|       | no cholestasis      | 28 | 0.397 | 0.228-0.480 |         |
| GLCA  | cholestasis         | 6  | 0.018 | 0.011-0.035 | 0.514   |
|       | no cholestasis      | 28 | 0.051 | 0.001-0.175 |         |
| GDCA  | cholestasis         | 6  | 0.759 | 0.605-1.165 | 0.439   |
|       | no cholestasis      | 28 | 0.561 | 0.371-1.188 |         |
| GUDCA | cholestasis         | 6  | 0.206 | 0.187-0.315 | 0.220   |
|       | no cholestasis      | 28 | 0.292 | 0.197-1.040 |         |
| TCA   | cholestasis         | 6  | 0.063 | 0.042-0.096 | 0.011   |
|       | no cholestasis      | 28 | 0.022 | 0.009-0.049 |         |
| TCDCA | cholestasis         | 6  | 0.782 | 0.591-1.039 | 0.5221  |
|       | no cholestasis      | 28 | 0.675 | 0.448-0.919 |         |
| TLCA  | cholestasis         | 6  | 0.000 | 0.000-0.000 | 0.012   |
|       | no cholestasis      | 28 | 0.000 | 0.000-0.000 |         |
| TDCA  | cholestasis         | 6  | 0.162 | 0.097-0.531 | 0.947   |
|       | no cholestasis      | 28 | 0.177 | 0.101-0.250 |         |
| TUDCA | cholestasis         | 6  | 0.002 | 0.002-0.003 | 0.010   |
|       | no cholestasis      | 28 | 0.000 | 0.000-0.001 |         |
| CA    | cholestasis         | 6  | 0.063 | 0.023-0.198 | 0.310   |
|       | no cholestasis      | 28 | 0.036 | 0.000-0.171 |         |
| CDCA  | cholestasis         | 6  | 0.178 | 0.095-0.284 | 0.121   |
|       | no cholestasis      | 28 | 0.287 | 0.146-0.736 |         |

|      |                |    |       |             |         |
|------|----------------|----|-------|-------------|---------|
| LCA  | cholestasis    | 6  | 0.019 | 0.010-0.037 | 0.431   |
|      | no cholestasis | 28 | 0.034 | 0.001-0.096 |         |
| DCA  | cholestasis    | 6  | 0.118 | 0.068-0.159 | 0.172   |
|      | no cholestasis | 28 | 0.279 | 0.078-0.895 |         |
| UDCA | cholestasis    | 6  | 0.003 | 0.002-0.006 | < 0.001 |
|      | no cholestasis | 28 | 0.026 | 0.010-0.097 |         |

**Significant differences are shown in bold.**

Orange = glycine conjugated BA, green = taurine conjugated BA, blue = unconjugated BA.
